# Supplementary material
Source: PubMed Central journal article supplement (PMC2099666)
Supplement: bjpg57-615TableS1.pdf [file bjpg57-615TableS1.pdf]

**Supplementary Table 1. Type of appointment obtained by patients in Advanced Access and control practices.**

|                                                                                         | Answer         | Group                               |                             | Difference                 |                                   | P-value <sup>b</sup> |
|-----------------------------------------------------------------------------------------|----------------|-------------------------------------|-----------------------------|----------------------------|-----------------------------------|----------------------|
|                                                                                         |                | Advanced Access, n (%) <sup>a</sup> | Control, n (%) <sup>a</sup> | Unadjusted odds ratio (OR) | Adjusted OR (95% CI) <sup>b</sup> |                      |
| Is this appointment on the day of your choice?                                          | Yes            | 4264 (90)                           | 3362 (86)                   | 1.49                       | 1.27 (0.88 to 1.83)               | 0.20                 |
|                                                                                         | No             | 457 (10)                            | 538 (14)                    |                            |                                   |                      |
|                                                                                         | Don't mind     | 836                                 | 978                         |                            |                                   |                      |
| Is this appointment at a convenient time?                                               | Yes            | 4864 (95)                           | 4177 (95)                   | 1.1                        | 0.92 (0.64 to 1.31)               | 0.64                 |
|                                                                                         | No             | 230 (5)                             | 217 (5)                     |                            |                                   |                      |
|                                                                                         | Don't mind     | 447                                 | 462                         |                            |                                   |                      |
| Did you get this appointment as quickly as you wanted?                                  | Yes            | 4757 (90)                           | 3885 (85)                   | 1.51                       | 1.31 (0.86 to 2.00)               | 0.22                 |
|                                                                                         | No             | 550 (10)                            | 679 (15)                    |                            |                                   |                      |
|                                                                                         | Don't mind     | 214                                 | 253                         |                            |                                   |                      |
| Is this appointment with the particular doctor or nurse that you ideally wanted to see? | Yes            | 3486 (84)                           | 2724 (83)                   | 1.11                       | 1.16 (0.83 to 1.62)               | 0.40                 |
|                                                                                         | No             | 642 (16)                            | 557 (17)                    |                            |                                   |                      |
|                                                                                         | Don't mind     | 1385                                | 1549                        |                            |                                   |                      |
| Were you able to book this appointment well in advance?                                 | Yes            | 1756 (52)                           | 2238 (75)                   | 0.4                        | 0.36 (0.20 to 0.64)               | <0.001               |
|                                                                                         | No             | 1634 (48)                           | 728 (25)                    |                            |                                   |                      |
|                                                                                         | Doesn't matter | 1939                                | 1708                        |                            |                                   |                      |
| Is this appointment with a doctor or nurse?                                             | Doctor         | 5350 (98)                           | 4518 (95)                   | 2.24                       | 2.50 (0.91 to 6.84)               | 0.07                 |
|                                                                                         | Nurse          | 136 (2)                             | 257 (5)                     |                            |                                   |                      |
|                                                                                         | Don't know     | 49                                  | 71                          |                            |                                   |                      |
| Is this appointment with a male or a female?                                            | Male           | 3306 (65)                           | 2689 (64)                   | 1.05                       | 1.23 (0.77 to 1.95)               | 0.38                 |
|                                                                                         | Female         | 1789 (35)                           | 1533 (36)                   |                            |                                   |                      |
|                                                                                         | Don't know     | 388                                 | 559                         |                            |                                   |                      |

<sup>a</sup>Percentages are shown of those responding yes or no, excluding those who did not know or did not mind and also excluding missing values. <sup>b</sup>Logistic regression, adjusted for age, sex, ethnicity, and accommodation status at patient level and list size, training, PMS and previous fund-holding status at practice level, and accounting for clustering by practice.
