# Supplementary material
Source: PubMed Central journal article supplement (PMC2099666)
Supplement: bjpg57-615TableS2.pdf [file bjpg57-615TableS2.pdf]

**Supplementary Table 2. Continuity of care in Advanced Access and control practices.**

| Continuity of care | Group, n (%)                |                     |                   |
|--------------------|-----------------------------|---------------------|-------------------|
|                    | Advanced Access<br>n = 5173 | Control<br>n = 4344 | Total<br>n = 9517 |
| Always             | 924 (18)                    | 694 (16)            | 1618 (17)         |
| Almost always      | 1884 (36)                   | 1436 (33)           | 3320 (35)         |
| A lot of the time  | 820 (16)                    | 787 (18)            | 1607 (17)         |
| Some of the time   | 1104 (21)                   | 1026 (24)           | 2130 (22)         |
| Almost never       | 380 (7)                     | 347 (8)             | 727 (8)           |
| Never              | 61 (1)                      | 54 (1)              | 115 (1)           |

*In response to question 'In general, how often do you see your usual doctor?'*

**Supplementary Table 3. Overall satisfaction with appointment system at Advanced Access and control practices.**

| Satisfaction            | Group, n (%)                |                     |                    |
|-------------------------|-----------------------------|---------------------|--------------------|
|                         | Advanced Access<br>n = 5594 | Control<br>n = 4933 | Total<br>n = 10527 |
| Completely satisfied    | 1117 (20)                   | 941 (19)            | 2058 (20)          |
| Very satisfied          | 1794 (32)                   | 1638 (33)           | 3432 (33)          |
| Fairly satisfied        | 1629 (29)                   | 1415 (29)           | 3044 (29)          |
| Neutral                 | 474 (9)                     | 489 (10)            | 963 (9)            |
| Fairly dissatisfied     | 312 (6)                     | 203 (4)             | 515 (5)            |
| Very dissatisfied       | 145 (3)                     | 123 (3)             | 268 (3)            |
| Completely dissatisfied | 123 (2)                     | 124 (3)             | 247 (2)            |

*In response to question: 'All things considered, how satisfied are you with the appointment system at your practice?'*
